# Supplementary material for: Examination of Factors Affecting Site-Directed RNA Editing by the MS2-ADAR1 Deaminase System
Source: MDPI journal article supplement (doi:10.3390/genes14081584), 2023-08-04
Supplement: s1 [file s1]

## Examination of Factors Affecting Site-Directed RNA Editing by the MS2-ADAR1 Deaminase System

Md Thoufic Anam Azad <sup>1,2,†</sup>, Umme Qulsum <sup>1,3,†</sup> and Toshifumi Tsukahara <sup>1,4,\*</sup>

<sup>1</sup> Area of Bioscience, Biotechnology and Biomedical Engineering Research Area, Japan Advanced Institute of Science and Technology (JAIST), 1-1 Asahidai, Nomi City 923-1292, Ishikawa, Japan; thoufic@ru.ac.bd (M.T.A.A.); qulsum@ru.ac.bd (U.Q.)

<sup>2</sup> Department of Veterinary and Animal Sciences, University of Rajshahi, Rajshahi 6205, Bangladesh

<sup>3</sup> Department of Botany, Faculty of Biological Sciences, University of Rajshahi, Rajshahi 6205, Bangladesh

<sup>4</sup> GeCoRT Co., Ltd., 2-11-2 Takashima, Nishi-ku, Yokohama 220-0011, Kanagawa, Japan

\* Correspondence: tsukahara@jaist.ac.jp.

† Current address: Graduate School of Agricultural Science, Tohoku University, 232-3 Yomogida, Naruko-onsen, Osaki City 989-6711, Miyagi, Japan.

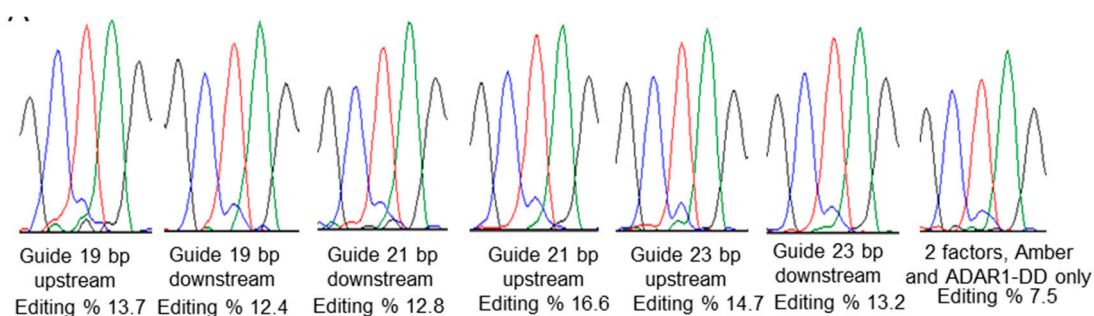

**Supporting Figure S1.** Sequencing results showing the comparative efficiencies of the six guide RNAs for *EGFP* RNA editing.

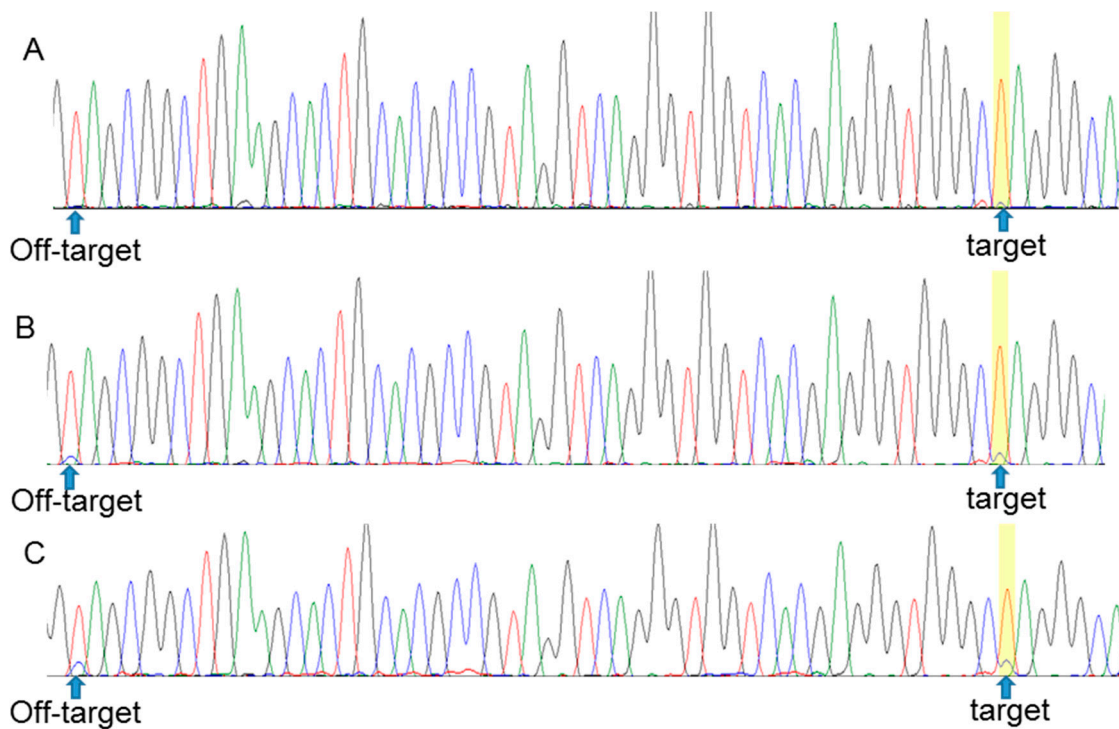

**Supporting Figure S2.** Sequencing analysis of *EGFP* for cells transfected with 500 ng of 21 bp upstream guide RNA and 250 ng (A), 500 ng (B), or 1000 ng (C) of MS2-ADADR1-DD.

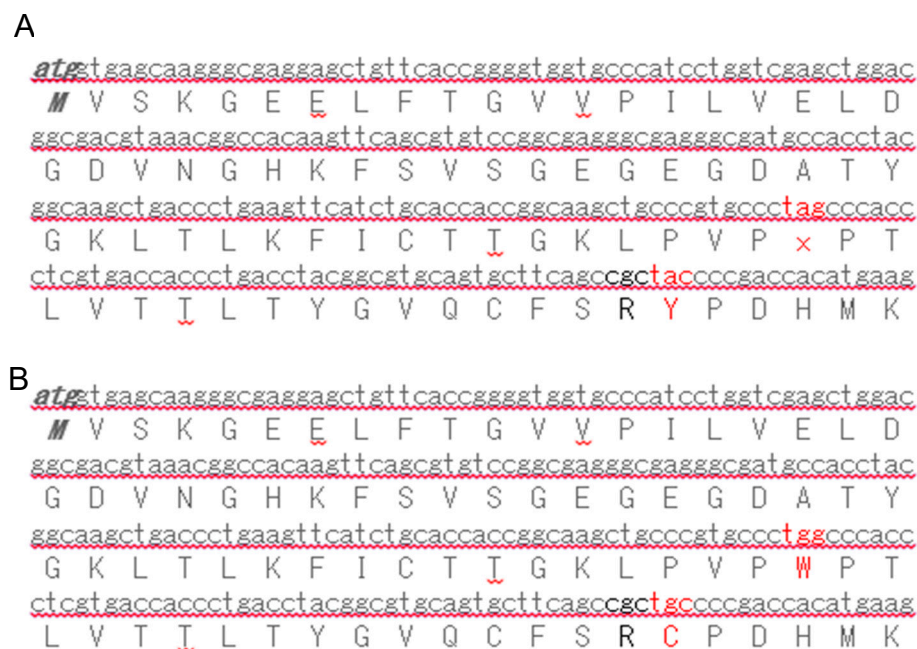

**Supporting Figure S3.** The sequence of the mutated (A) and restored (B) *EGFP* site. The target site (TAG) is indicated. Off-target editing of TAC to TGC is also shown.

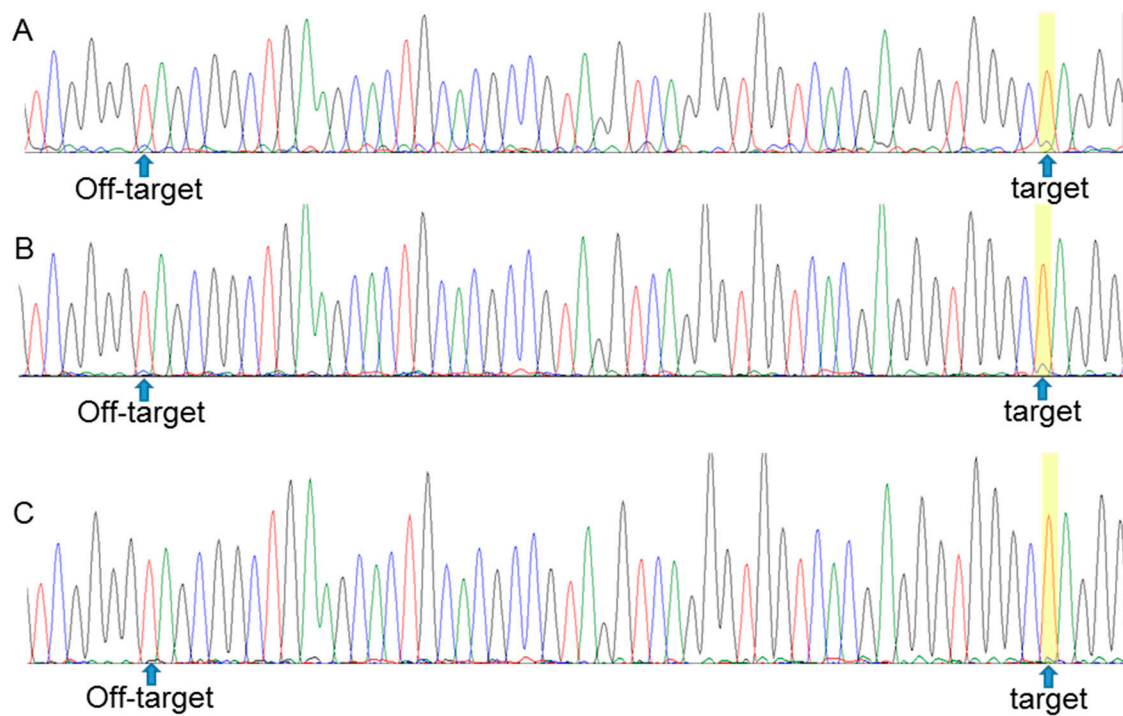

**Supporting Figure S4.** Sequencing analysis of *EGFP* in cells transfected with 500 ng of MS2-ADADR1-DD and 250 ng (A), 500 ng (B), or 1000 ng (C) of 21 nt upstream guide RNA.

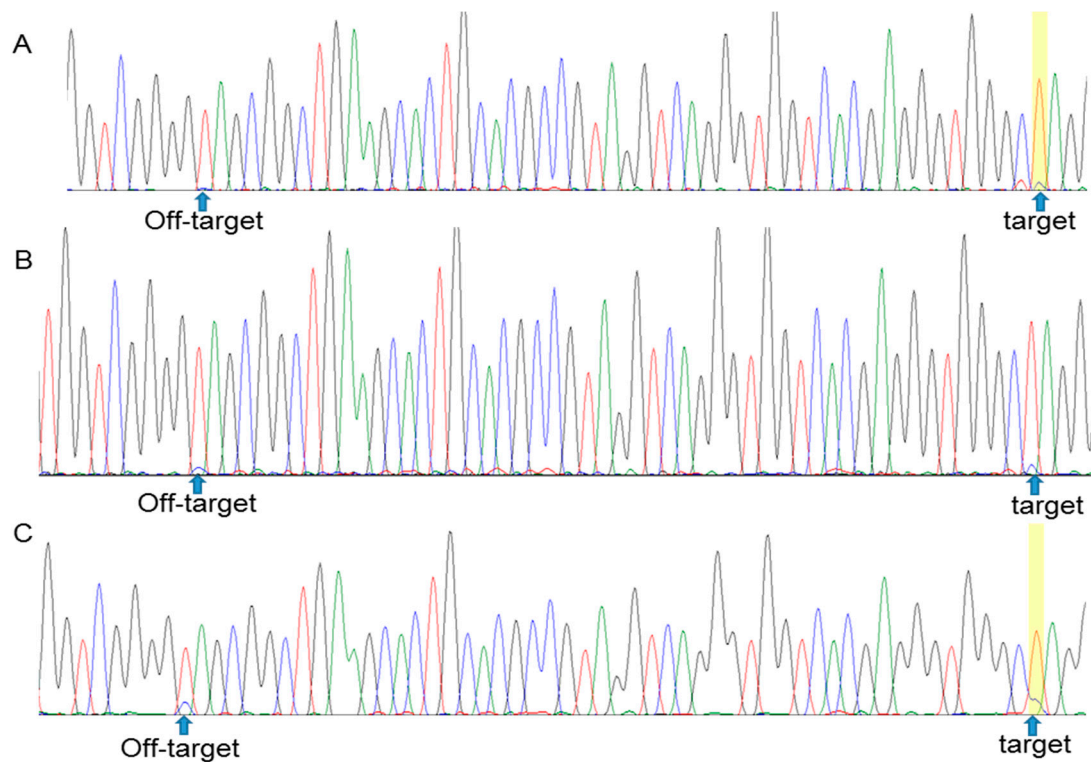

**Supporting Figure S5.** Sanger sequencing analysis of *EGFP* in cells transfected with 500 ng of double repeated 19 nt 2 $\times$  upstream guide RNA and 250 ng (A), 500 ng (B), or 1000 ng (C) of MS2-ADAR1-DD.

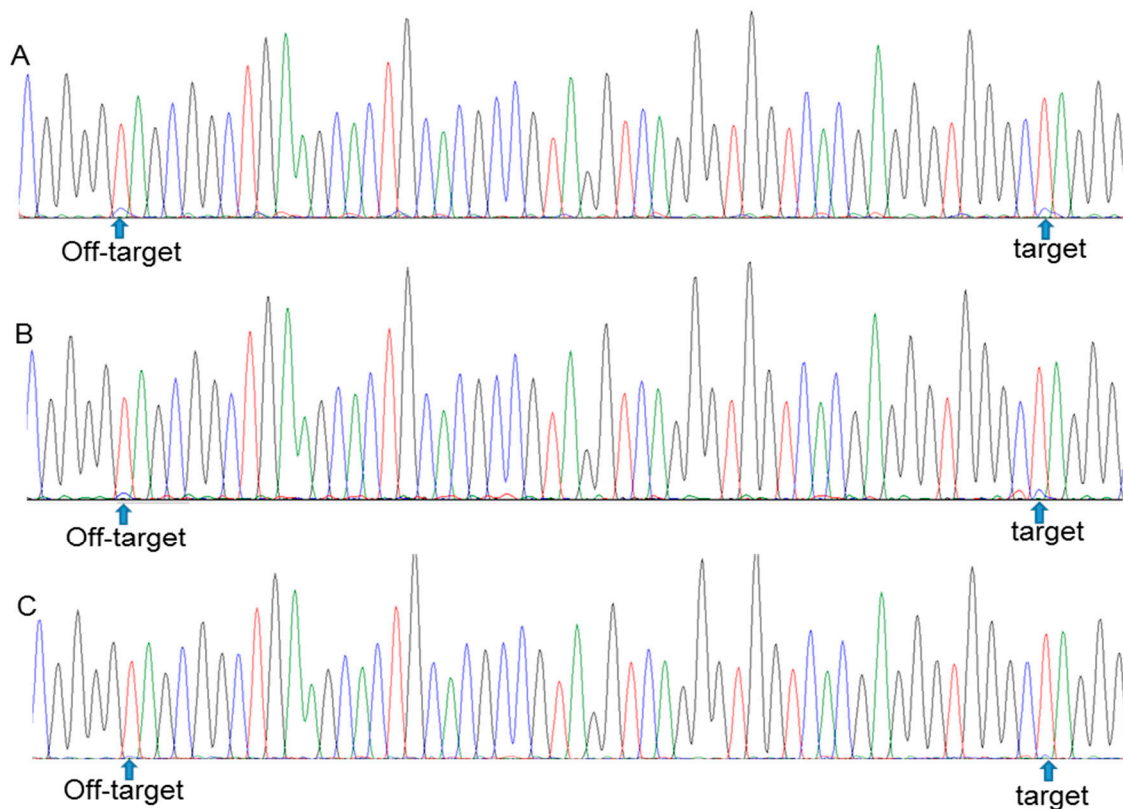

**Supporting Figure S6.** Sequencing analysis of *EGFP* in cells transfected with 500 ng of MS2-ADADR1-DD and 250 ng (A), 500 ng (B), or 1000 ng (C) of double repeated 19 nt 2 $\times$  upstream guide RNA.

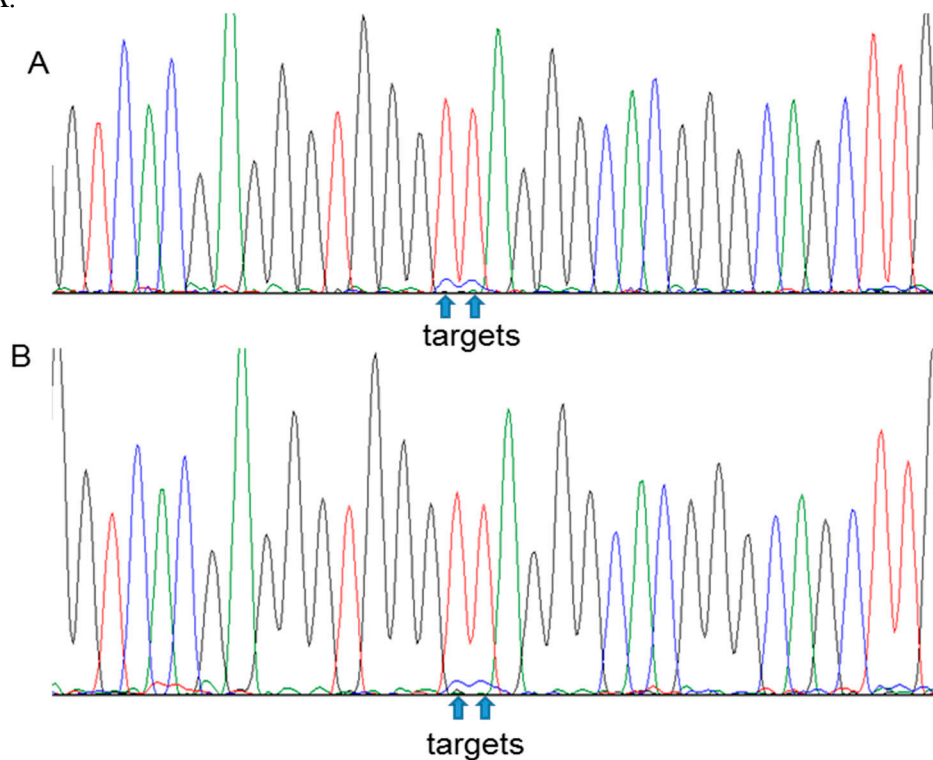

**Supporting Figure S7.** Sequencing analysis of the conversion of the ochre stop codon (TAA) to the tryptophan codon (TGG). (A) and (B) are replicates of the experiment. HEK-293 cells were transfected with 500 ng of MS2-ADADR1-DD and 250 ng of the 21 nt upstream guide RNA.

Bright image, left panel

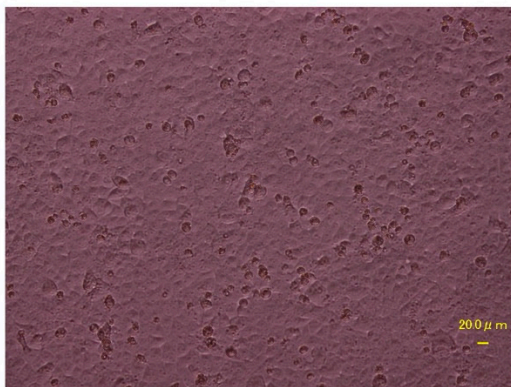

Fluorescence image, Right panel

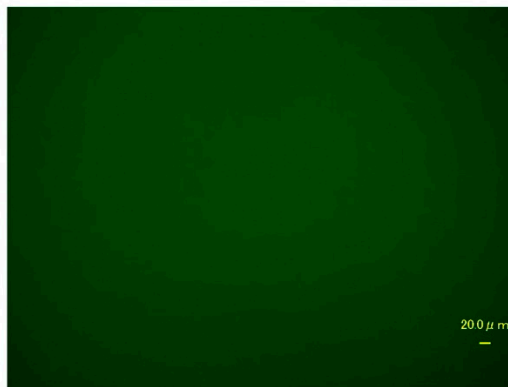

Fig. Negative Control

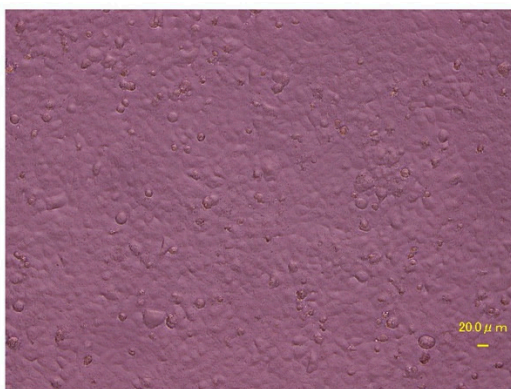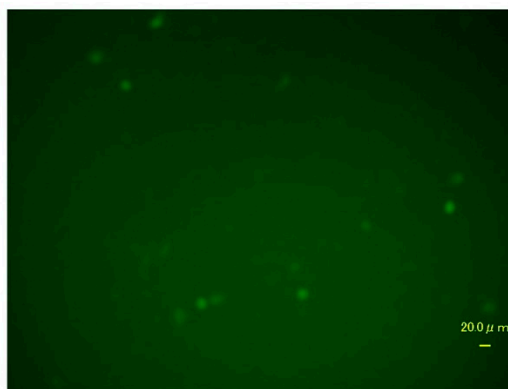

Fig. Experimental, MS2-ADAR1-DD, mutated EGFP and Guide RNA

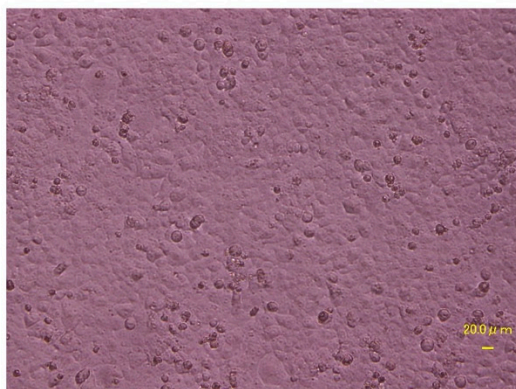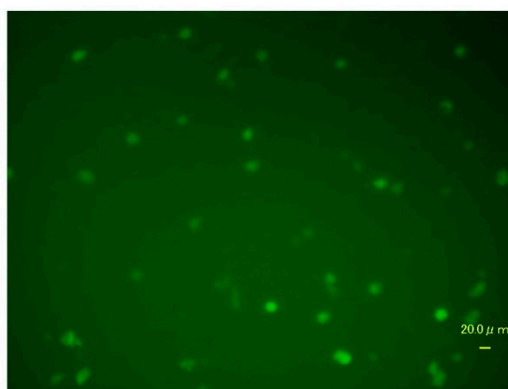

Fig. Positive Control, EGFP

**Supporting Figure S8.** Transfection experiment in HeLa cells. Bright image in left panel and fluorescence image in right panel of same focus. Figures were taken by Keyence Biozero fluorescence microscope, BZ-X800. Except the green fluorescence signal, the microscopic images show no remarkable observable differences among the treatment and control groups of cells
